# Supplementary material
Source: PubMed Central journal article supplement (PMC3107293)
Supplement: 1100050108_pnas.1100050108_SI.pdf [file 1100050108_pnas.1100050108_SI.pdf]

# Supporting Information

Takayama and Clore 10.1073/pnas.1100050108

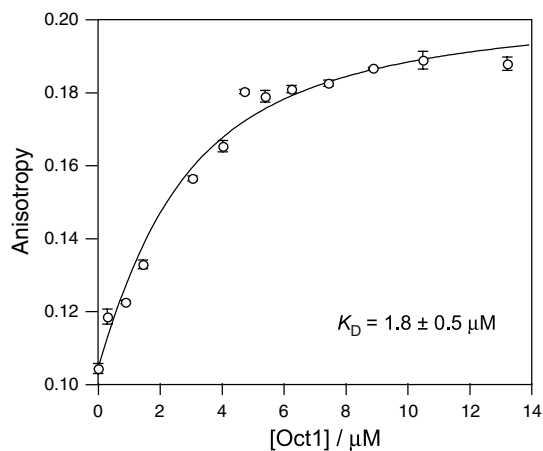

**Fig. S1.** Nonspecific binding of Oct1 to DNA monitored by fluorescence anisotropy. The sequence of the nonspecific 24-bp DNA duplex is shown in Fig. 1A of the main text, and the rhodamine fluorescent label is conjugated to the 5' end of the bottom strand. The concentration of DNA is 1.7  $\mu\text{M}$  in 10 mM Tris-HCl pH 7.4 and 150 mM NaCl. The excitation and emission wavelengths are 550 and 580 nm, respectively. The experimental data points (error bars, 1 SD) are shown as filled-in circles, and the best-fit curve with an apparent  $K_D$  of 1.8–0.5  $\mu\text{M}$  is shown as a solid line.
